# Supplementary material for: Comparative anatomy of the thoracic muscles of bees (Hymenoptera: Apoidea)
Source: PeerJ. 2026 Jan 6;14:e20532. doi: 10.7717/peerj.20532 (PMC12786119; doi:10.7717/peerj.20532)
Supplement: Supplemental Information 1 — Tabulation of the terminology applied to the mesosomal skeletomusculature used in this work and contrasted with Snodgrass (1942), Vilhelmsen (2000a); Vilhelmsen (2000b), Mikó et al. (2007), Friedrich & Beutel (2008), Vilhelmsen, Mikó & Krogmann (2010), Willsch et al. (2020), Aibekova et al. (2022), and Lieberman et al. (2022). List of muscle groups with variation detected within bees and Apoidea. [file peerj-14-20532-s001.xlsx]

## Sheet: Terminology
This study	Snodgrass, 1942		Vilhelmsen et al., 2000a	Vilhelmsen et al., 2000b	Mikó et al., 2007	Friedrich & Beutel, 2008	Vilhelmsen et al., 2010	Aibekova et al., 2022	Lieberman et al., 2022
Idlm2, M. pronoto-occipitalis	Inferior phragmatic levator of the head	41	-	Prophragmo-postoccipital	Pronoto-postoccipital and First phragmo-postoccipital	Idlm2, M. pronoto-occipitalis	Prophragmo-postoccipital	Idlm2, M. pronoto-occipitalis	-
Idlm1, M. prophragma-occipitalis	Superior phragmatic levator of the head	40	-	Prophragmo-postoccipital	Pronoto-postoccipital and First phragmo-postoccipita	Idlm1, M. prophragma-occipitalis	Prophragmo-postoccipital	Idlm1, M. prophragma-occipitalis	-
Itpm1, M. pleurocrista-occipitalis	Pleural levator, or rotator, of the head	42a	-	Laterocervical-postoccipital	Propleuro-postoccipital	Itpm1, M. pleurocrista-occipitalis	Lateral propleuro-postoccipital	Itpm1, M. pleurocrista-occipitalis	-
Itpm2a, M. propleuro-occipitalis dorsal		42b	-			Itpm2, M. propleuro-occipitalis	Median and posterior propleuro-postoccipital	Itpm2, M. propleuro-occipitalis	-
Itpm2a, M. propleuro-occipitalis ventral		42c	-						-
Idvm9, M. profurca-occipitalis	Endosternal levator, or rotator, of the head	43	-	Dorsal profurco-postoccipital	Dorsal profurco-postoccipital	Idvm9, M. profurca-occipitalis	Dorsal profurco-postoccipital and Propleural arm-postoccipital	Idvm9, M. profurca-occipitalis	-
Ivlm3, M. profurca-tentorialis	Depressor of the head	44	-	Ventral profurco-postoccipital	Ventral profurco-postoccipital	Ivlm3, M. profurca-tentorialis	Ventral profurco-postoccipital	Ivlm3, M. profurca-tentorialis	-
Idlm5, M. pronoto-phragmalis anterior	Intersegmental dorsal muscle of the prothorax	45	-	Prophragmo-pronotal	Pronoto-prophragmal	Idlm5, M. pronoto-phragmalis anterior	Median and lateral Pronoto-prophragmal	Idlm5, M. pronoto-phragmalis anterior	-
Idvm5a, M. pronoto-cervicalis anterior primus	Phragmatopleural muscle of the protorax	46	-	Prophragmo-laterocervical	Pronoto-laterocervical	Idvm5, M. pronoto-cervicalis anterior	Anterior and posterior pronoto-laterocervical	Idvm5, M. pronoto-cervicalis anterior	-
Idvm5b, M. pronoto-cervicalis anterior secundus	-	47	-		-				-
Itpm3, M. pronoto-pleuralis anterior	Tergoepisternal muscle of the prothorax	48	-	Pronoto-proepisternal	Pronoto-propleural	Itpm3, M. pronoto-pleuralis anterior	Pronoto-propleural	Itpm3, M. pronoto-pleuralis anterior	-
Itpm4, M. pronoto-apodemalis anterior	Protractor of the propectus	49	-	Pronoto-propleural arm	Pronoto-profurcal	Itpm4, M. pronoto-apodemalis anterior	Pronoto-propleural arm and Pronoto-profurcal	Itpm4, M. pronoto-apodemalis anterior	-
Itpm5, M. pronoto-apodemalis posterior		50	-			Itpm5, M. pronoto-apodemalis posterior		Itpm5, M. pronoto-apodemalis posterior	-
Ivlm1, M. profurca-cervicalis	Adductor of the propleuron	51	-	Profurco-laterocervical	Profurco-laterocervical	Ivlm1, M. profurca-cervicalis	Profurco-laterocervical	Ivlm1, M. profurca-cervicalis	-
Ivlm7, M. profurca-mesofurcalis	Intersegmental ventral muscle of the prothorax, endosternal retractor of the propectus	52	-	Ventral mesofurco-profurcal and dorsal mesofurco-profurcal	Ventral mesofurco-profurcal	Ivlm7, M. profurca-mesofurcalis	Ventral mesofurco-profurcal and dorsal mesofurco-profurcal	Ivlm7a, Mesofurca-profurcalis and Ivlm7b, Profurca-mesofurcalis	-
Ipcm2, M. procoxa cervicalis transversalis	-	-	-	Procoxo-laterocervical	Laterocervico-procoxal	Ipcm2, M. procoxa cervicalis transversalis	Laterocervico-procoxal	Ipcm2, M. procoxa cervicalis transversalis	-
Ipcm4, M. propleuro-coxalis superior	Lateral promotor of the fore coxa	53	-	Propleuro-procoxal	Propleuro-procoxal	Ipcm4, M. propleuro-coxalis superior	Propleuro-procoxal and anterior profurco-procoxal	Ipcm4, M. propleuro-coxalis superior	-
Iscm1, M. profurca-coxalis anterior	Mesal promotor of the fore coxa	54	-	Prosterno-procoxal	Prosterno-procoxal	Iscm1, M. profurca-coxalis anterior	Prosterno-procoxal	Iscm1, M. profurca-coxalis anterior	-
Idvm18, M. pronoto-coxalis lateralis	First lateral remotor of the fore coxa	55	-	Pronoto-procoxal	Pronoto-procoxal	Idvm18, M. pronoto-coxalis lateralis	Dorsal pronoto-procoxal	Idvm18, M. pronoto-coxalis lateralis	-
Iscm4, M. profurca-coxalis lateralis	Second lateral remotor of the fore coxa	56	-	Lateral profurco-procoxal	Median profurco-procoxal	Iscm4, M. profurca-coxalis lateralis	Propleural arm-procoxal and dorsal profurco-procoxal	Iscm4, M. profurca-coxalis lateralis	-
Iscm3, M. profurca-coxalis medialis	Mesal remotor of the fore coxa	57	-	Median profurco-procoxal	Lateral profurco-procoxal	Iscm3, M. profurca-coxalis medialis	Median profurco-procoxal	Iscm3, M. profurca-coxalis medialis	-
Iscm5, M. prospina-coxalis	Coxal retractor of the propectus	58	-	Prospino-procoxal	Mesosterno-procoxal	Iscm5, M. prospina-coxalis	Prospinasterno-procoxal	-	-
Iscm6, M. profurca-trochanteralis	Thoracic depressor of the fore trochanter	61	-	Propleuro/furco-trochanteral	Propleuro-protrochanteral	Iscm6, M. profurca-trochanteralis	Propleuro-protrochanteral and Propleuro arm-protrochanteral and profurco-protrochanteral	Iscm6, M. profurca-trochanteralis	-
IIIdlm3, M. metascutello-scutellaris	External longitudinal dorsal muscle of the mesothorax	70	-	Mesoscutello-metanotal	Mesoscutello-metanotal	IIIdlm3, M. metascutello-scutellaris	Posterior mesonoto-metanotal	-	-
IIdlm1, M. prophragma-mesophragmalis	Internal longitudinal dorsal muscle of the mesothorax. Indirect depressor of the wing	71	-	-	First phragmo-second phragmal	IIdlm1, M. prophragma-mesophragmalis	Prophragmo-mesophragmal	-	-
IIdvm1, M. mesonoto-sternalis	Tergosternal muscle of the mesothorax; indirect depressor of the wing	72	-	-	First mesopleuro-mesonotal	IIdvm1, M. mesonoto-sternalis	First mesopleuro-mesonotal	-	-
IIpspim1, M. mesanepisterno-spiracularis	Occlusor of the first spiracle	73	-	-	Pronoto-mesothoracic spiracle	-	Anterior thoracic spiracle occlusor	IIpspim1, M. mesanepisterno-spiracularis	-
IItpm5, M. mesonoto-pleuralis medialis	Pleurotergal muscle of the mesothorax	75	-	-	Second mesopleuro-mesonotal	IItpm5, M. mesonoto-pleuralis medialis	Second mesopleuro-mesonotal	-	-
IItpm7a, M. mesanepisterno-axillaris ventral	Pleuroaxillary muscles of the mesothorax. Flexors of the fore wing	76a	-	-	Pronoto-third axillary sclerite	IItpm7, M. mesanepisterno-axillaris	First mesopleuro-third axillary sclerite of the fore wing	-	-
IItpm7b, M. mesanepisterno-axillaris medial		76b	-	-	Anterior mesopleuro-third axillary sclerite of the fore wing		Second mesopleuro-third axillary sclerite of the fore wing	-	-
IItpm7c, M. mesanepisterno-axillaris dorsal		76c	-	-	Posterior mesopleuro-third axillary sclerite of fore wing		Third mesopleuro-third axillary sclerite of fore wing	-	-
IIspm1, M. mesopleura-sternalis	Basalar muscle of the mesothorax	77	-	-	Mesopleuro-mesobasalar	IIspm1, M. mesopleura-sternalis	Mesopleuro-mesobasalar	-	-
IIdvm8, M. mesofurca-phragmalis	Muscle of the axillary lever of the mesothorax	78	-	-	Mesofurco-mesolaterophragmal	IIdvm8, M. mesofurca-phragmalis	Anterior mesofurco-mesolaterophragmal	-	-
IIspm2, M. mesofurca-pleuralis	Pleurosternal muscle of the mesothorax	79	-	-	Mesopleuro-mesofurcal	IIspm2, M. mesofurca-pleuralis	Anterior mesopleuro-mesofurcal	IIspm2, M. mesofurca-pleuralis	-
IIpcm4, M. propleuro-coxalis posterior	Lateral promotor of the middle coxa	80	-	-	Mesopleuro-mesocoxal	IIpcm4, M. propleuro-coxalis posterior	Mesopleuro-mesocoxal	IIpcm4, M. propleuro-coxalis posterior	-
IIscm1, M. mesofurca-coxalis anterior	Mesal promotor of the middle coxa	81	-	-	Mesosterno-mesocoxal	IIscm1, M. mesofurca-coxalis anterior	Mesosterno-mesocoxal	IIscm1, M. mesofurca-coxalis anterior	-
IIdvm6, M. mesocoxa-subalaris	Lateral remotor of the middle coxa. Coxosubalar muscle of the mesothorax	82	-	-	Mesocoxo-mesosubalar	IIdvm6, M. mesocoxa-subalaris	Mesocoxo-mesosubalar	-	-
IIscm2, M. mesofurca-coxalis posterior	Mesal remotor of the middle coxa	83	-	-	Mesofurco-mesocoxal	IIscm2, M. mesofurca-coxalis posterior	Mesofurco-mesocoxal	IIscm2, M. mesofurca-coxalis posterior	-
IIscm6, M. mesofurca-trochanteralis	Thoracic depressor of the middle trochanter	86	-	-	? Median mesofurco-mesotrochanteral ?	IIscm6, M. mesofurca-trochanteralis	Mesofurco-mesotrochanteral median and lateral	IIscm6, M. mesofurca-trochanteralis	-
IIIdlm1, M. mesophragma-metaphragmalis	Retractor of the mesothoracic postphragma	96	Second phragmo-third phragmal	-	Second phragmo-third phragmal	IIIdlm1, M. mesophragma-metaphragmalis	Mesophragmo-metaphragmal median	-	-
IIItpm5, M. metanoto-pleuralis medialis	First tergosternal muscle of the metathorax	97	Metanoto-metapleural medial and lateral	-	Metapleuro-metanotal	IIItpm5, M. metanoto-pleuralis medialis	Metapleuro-metanotal anterolateral and posterolateral	-	-
IIItpm6, M. metanoto-pleuralis posterior	Second tergosternal muscle of the metathorax	98		-		IIItpm6, M. metanoto-pleuralis posterior		-	-
IIIdvm1, M. metanoto-sternalis	Third tergosternal muscle of the metathorax	99		-		IIIdvm1, M. metanoto-sternalis		-	-
IIItpm7, M. metanepisterno-axillaris	Pleuroaxillary muscle of the metathorax. Flexor of the hind wing	100	Metapleuro-hind wing	-	Metapleuro-third axillary sclerite of hind wing	IIItpm7, M. metanepisterno-axillaris	Metapleuro-third axillary sclerite of hind wing dorsal and ventral	-	-
IIIspm1, M. metapleura-sternalis	Basalar muscle of the metathorax	101	Metabasalar-metapleural	-	Metapleuro-metabasalar	IIIspm1, M. metapleura-sternalis	Anterior metapleuro-metabasalar	-	-
IIItpm11, M. metapleura-subalaris	Pleurosubalar muscle of the metathorax	102	Metapleuro-metasubalar	-	Metapleuro-metasubalar	IIItpm11, M. metapleura-subalaris	Metapleuro-metasubalar	-	-
IIIpcm4, M. metanepisterno-coxalis posterior	Lateral promotor of the hind coxa	103	Lateral metapleuro-metacoxal	-	Lateral metapleuro-metacoxal	IIIpcm4, M. metanepisterno-coxalis	Lateral metapleuro-metacoxal	IIIpcm4, M. metanepisterno-coxalis	-
IIIscm1, M. metafurca-coxalis anterior	Mesal promotor of the hind coxa	104	Median metapleuro-metacoxal	-	Median metapleuro-metacoxal	IIIscm1, M. metafurca-coxalis anterior	Median metapleuro-metacoxal	IIIscm1, M. metafurca-coxalis anterior	-
IIIdvm6, M. metacoxa-subalaris	Lateral remotor of the hind coxa. Coxosubalar muscle of the metathorax	105	Metasubalar-metacoxal	-	Metacoxo-metasubalar	IIIdvm6, M. metacoxa-subalaris	Metacoxo-metasubalar	-	-
IIIscm2, M. metafurca-coxalis posterior	Mesal remotor of the hind coxa	106	Metafurco-metacoxal	-	Metafurco-metacoxal	IIIscm2, M. metafurca-coxalis posterior	Lateral metafurco-metacoxal	IIIscm2, M. metafurca-coxalis posterior	-
IIIscm3, M. metafurca-coxalis medialis				-		IIIscm3, M. metafurca-coxalis medialis	Median metafurco-metacoxal	IIIscm3, M. metafurca-coxalis medialis	-
IIIscm6, M. metafurca-trochanteralis	Thoracic depressor of the hind trochanter	109	Metafurco-trochanteral	-	Metafurco-metatrochanteral	IIIscm6, M. metafurca-trochanteralis	Metafurco-metatrochanteral	IIIscm6, M. metafurca-trochanteralis	-
IIIvomm, M. metafurca‐abdominosternalis medialis	Median intersegmental ventral muscle of the metathorax	118	Metafurco-S2	-	Metafurco-second abdominal sternal	IIIvlm2, M. metafurca-abdominosternalis	Metafurco-second abdominal sternal	IIIvlm2, M. metafurca-abdominosternalis	IIIvomm, M. metafurca‐abdominosternalis medialis
IIIvolm, M. metafurca‐abdominosternalis lateralis	Lateral intersegmental ventral muscle of the metathorax	119	Metafurco-S2	-	Propodeo-second abdominal tergal	IIIvlm3, M. metaspina-abdominosternalis		IIIvlm3, M. metaspina-abdominosternalis	IIIvolm, M. metafurca‐abdominosternalis lateralis
1domm, M. tergo‐tergalis orthomedialis	Outer dorsal muscle of the propodeum. Median levator of the abdomen	120	-	-	Third phragmo-second abdominal tergal	-	Propodeo-second abdominal tergal	IA1, M. propodeo-abdominotergalis medialis	1domm, M. tergo‐tergalis orthomedialis
1dolm, M. tergo‐tergalis ortholateralis	Outer dorsal muscle of the propodeum. Dorsal lateromotor of the abdomen	121	Third phragma-second abdominal tergite	-	Propodeo-second abdominal sternal	-	Propodeo-second abdominal sternal	IA2, M. propodeo-abdominotergalis lateralis	1dolm, M. tergo‐tergalis ortholateralis
IAspim1, M. spiracularis I superior	Occlusor of the propodeal spiracle	122	-	-	-	-	Occlusor of the propodeal spiracle	IAspim1, M. spiracularis I superior	-
IAspim2, M. spiracularis I posterior	Dilator of the propodeal spiracle	123	-	-	Propodeo-first metasomal spiracle	-	Dilator of the propodeal spiracle	IAspim2, M. spiracularis I posterior	-

## Sheet: Variation
Muscle	Variable within bees	Variable within Apoidea
Idlm2, M. pronoto-occipitalis	NO	NO
Idlm1, M. prophragma-occipitalis	YES	YES
Itpm1, M. pleurocrista-occipitalis	NO	NO
Itpm2a, M. propleuro-occipitalis dorsal	NO	NO
Itpm2a, M. propleuro-occipitalis ventral	NO	NO
Idvm9, M. profurca-occipitalis	NO	NO
Ivlm3, M. profurca-tentorialis	YES	YES
Idlm5, M. pronoto-phragmalis anterior	NO	NO
Idvm5a, M. pronoto-cervicalis anterior primus	NO	NO
Idvm5b, M. pronoto-cervicalis anterior secundus	NO	NO
Itpm3, M. pronoto-pleuralis anterior	NO	NO
Itpm4, M. pronoto-apodemalis anterior	NO	NO
Itpm5, M. pronoto-apodemalis posterior	NO	NO
Ivlm1, M. profurca-cervicalis	NO	NO
Ivlm7, M. profurca-mesofurcalis	YES	YES
Ipcm2, M. procoxa cervicalis transversalis	NO	NO
Ipcm4, M. propleuro-coxalis superior	NO	NO
Iscm1, M. profurca-coxalis anterior	NO	NO
Idvm18, M. pronoto-coxalis lateralis	YES	YES
Iscm4, M. profurca-coxalis lateralis	NO	NO
Iscm3, M. profurca-coxalis medialis	NO	NO
Iscm5, M. prospina-coxalis	YES	YES
Iscm6, M. profurca-trochanteralis	NO	NO
IIIdlm3, M. metascutello-scutellaris	YES	YES
IIdlm1, M. prophragma-mesophragmalis	NO	NO
IIdvm1, M. mesonoto-sternalis	NO	NO
IIpspim1, M. mesanepisterno-spiracularis	NO	NO
IItpm5, M. mesonoto-pleuralis medialis	NO	NO
IItpm7a, M. mesanepisterno-axillaris ventral	NO	YES
IItpm7b, M. mesanepisterno-axillaris medial	NO	YES
IItpm7c, M. mesanepisterno-axillaris dorsal	NO	YES
IIspm1, M. mesopleura-sternalis	YES	YES
IIdvm8, M. mesofurca-phragmalis	NO	NO
IIspm2, M. mesofurca-pleuralis	NO	NO
IIpcm4, M. propleuro-coxalis posterior	YES	YES
IIscm1, M. mesofurca-coxalis anterior	NO	YES
IIdvm6, M. mesocoxa-subalaris	NO	NO
IIscm2, M. mesofurca-coxalis posterior	NO	NO
IIscm6, M. mesofurca-trochanteralis	YES	YES
IIIdlm1, M. mesophragma-metaphragmalis	NO	NO
IIItpm5, M. metanoto-pleuralis medialis	NO	NO
IIItpm6, M. metanoto-pleuralis posterior	NO	NO
IIIdvm1, M. metanoto-sternalis	NO	NO
IIItpm7, M. metanepisterno-axillaris	NO	NO
IIIspm1, M. metapleura-sternalis	NO	NO
IIItpm11, M. metapleura-subalaris	NO	NO
IIIpcm4, M. metanepisterno-coxalis posterior	NO	NO
IIIscm1, M. metafurca-coxalis anterior	NO	YES
IIIdvm6, M. metacoxa-subalaris	NO	NO
IIIscm2, M. metafurca-coxalis posterior	YES	YES
IIIscm3, M. metafurca-coxalis medialis	NO	YES
IIIscm6, M. metafurca-trochanteralis	NO	NO
IIIvomm, M. metafurca‐abdominosternalis medialis	YES	YES
IIIvolm, M. metafurca‐abdominosternalis lateralis	YES	YES
1domm, M. tergo‐tergalis orthomedialis	NO	NO
1dolm, M. tergo‐tergalis ortholateralis	NO	NO
IAspim1, M. spiracularis I superior	NO	NO
IAspim2, M. spiracularis I posterior	NO	NO
