# Supplementary material for: Comparative anatomy of the thoracic muscles of bees (Hymenoptera: Apoidea)
Source: PeerJ. 2026 Jan 6;14:e20532. doi: 10.7717/peerj.20532 (PMC12786119; doi:10.7717/peerj.20532)
Supplement: Supplemental Information 2 — 17 morphological characters and their respective states derived from the extrinsic mesosomal musculature of bees, which were scored for the 13 species of Apoidea (ten bee and three wasp species). [file peerj-14-20532-s002.xlsx]

## Sheet: Data matrix
Character matrix. 17 morphological characters and their respective states derived from the extrinsic mesosomal musculature of bees, which were scored for the 13 species of Apoidea (ten bee and three wasp species).
SPECIES	Character/States
	1	2	3	4	5	6	7	8	9	10	11	12	13	14	15	16	17
Apis mellifera	0	1	1	0	0	0	0	1	0	0	0	1	0	1	0	0	0
Melipona quadrifasciata	1	1	0	0	1	0	1	1	1	1	0	0	0	1	0	1	0
Tetragonisca fiebrigi	1	1	1	0	1	0	1	1	1	1	0	1	0	1	0	0	0
Hesperapis carinata	0	0	0	1	1	0	1	1	1	0	0	1	0	1	0	0	1
Schwarziana quadripunctata	1	1	0	0	1	0	1	1	1	1	0	1	0	1	0	0	0
Oragapostemon divaricatus	0	0	0	1	1	0	1	1	1	1	0	1	0	0	0	1	1
Psaenythia bergii	0	0	0	0	1	0	1	1	1	0	0	1	0	0	0	1	1
Tetraglossula anthracina	0	1	0	0	1	0	1	1	1	1	0	1	0	0	0	1	1
Lithurgus huberi	0	1	0	1	1	1	1	1	1	1	0	1	0	1	0	1	1
Oxaea flavescens	0	0	0	0	1	0	1	1	1	0	0	1	0	0	0	1	0
Trachypus boharti	1	1	0	0	1	0	1	0	1	0	1	1	1	1	1	1	1
Trypoxylon lactitarse	1	1	0	0	1	0	1	0	1	1	1	1	1	1	0	1	1
Steniolia duplicata	1	1	0	0	1	0	1	1	1	0	0	1	0	1	1	1	1
